# Supplementary material
Source: publisher figshare collection journal article supplement (https://acs.figshare.com/ndownloader/files/7240601)
Supplement: Supplementary file 1 [file 7240601]

## Supporting information

# **Supramolecular chemistry-assisted electrochemical method for the assay of endogenous peptidylarginine deiminases activities**

*Jing Zhao,<sup>†</sup> Lili Yang,<sup>†</sup> Yingying Tang,<sup>†</sup> Yucai Yang,<sup>‡</sup> Yongmei Yin<sup>\*‡</sup>*

<sup>†</sup>Center for Molecular Recognition and Biosensing, School of Life Sciences, Shanghai University, Shanghai 200444, P. R. China

<sup>‡</sup>Department of Oncology, the First Affiliated Hospital of Nanjing Medical University, Nanjing 210029, P. R. China

\*Corresponding author: Tel.: +86 25 68136043.  
E-mail address: yinym\_njmu@163.com (Y. Yin).

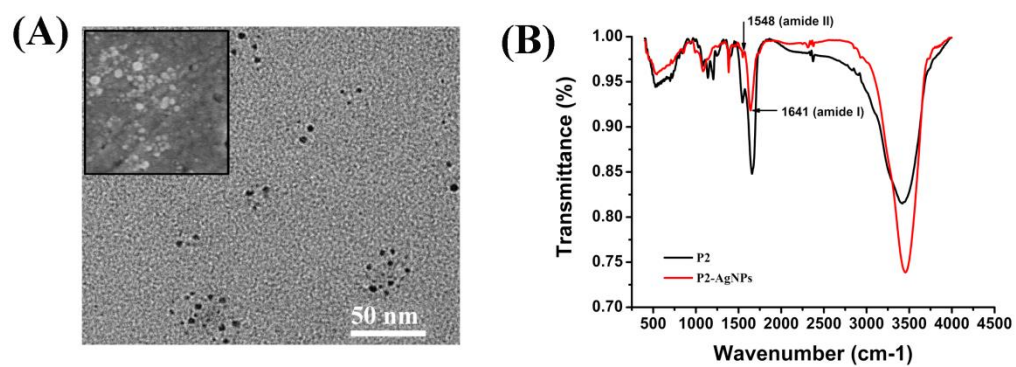

**Figure S1.** (A) TEM characterization of AgNPs and SEM images of AgNPs attached to the Au electrode (the inset). (B) The FTIR of P2 and P2-functionalized AgNPs.

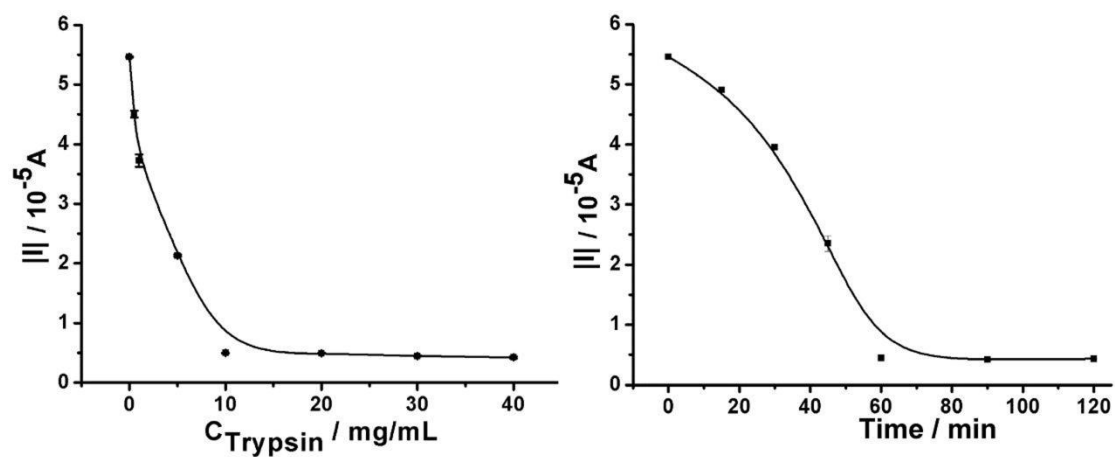

**Figure S2.** The optimization of the concentration of trypsin and the reaction time on the electrode surface.

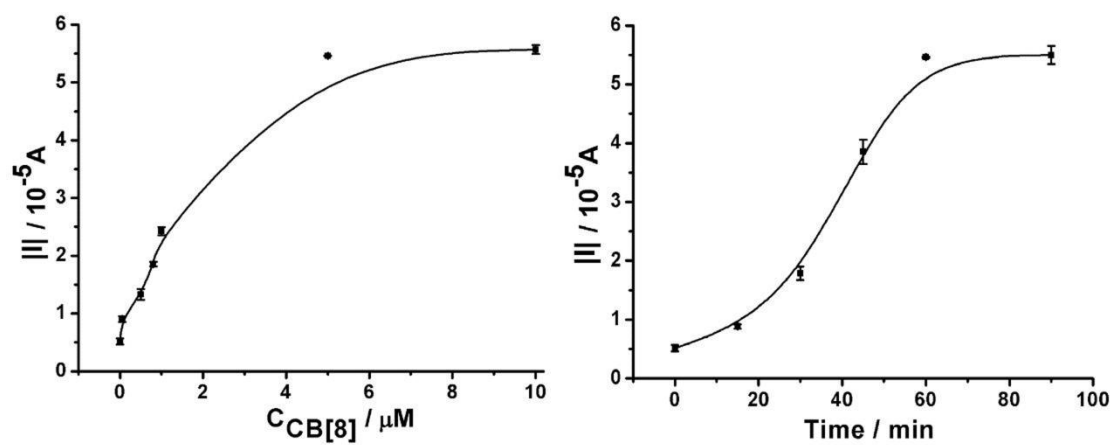

**Figure S3.** The optimization of the concentration of CB [8] and the reaction time on the P1 modified electrode.

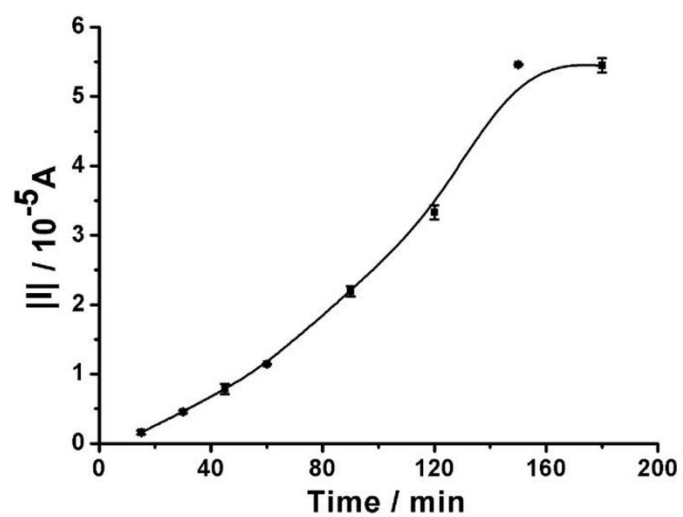

**Figure S4.** The optimization of the reaction time for the immobilization of P2-functionalized silver nanoparticles on the electrode surface.
